# Supplementary material for: In vivo bioluminescence imaging of the spatial and temporal colonization of lactobacillus plantarum 423 and enterococcus mundtii ST4SA in the intestinal tract of mice
Source: PubMed Central journal article supplement (PMC6208077; doi:10.1186/s12866-018-1315-4), 2018-10-30
Supplement: 12866_2018_1315_MOESM2_ESM.pdf [file 12866_2018_1315_MOESM2_ESM.pdf]

**Table S1. Primers used in this study**

| Target       | Primer  | Sequence (5' to 3') <sup>†</sup>               | Restriction sites | Product size (bp) |
|--------------|---------|------------------------------------------------|-------------------|-------------------|
| <i>Pldh</i>  | Pldh1   | GCGC <b><u>AGATCT</u></b> AATCTTCTCACCGTCTTG   | <i>Bgl</i> III    | 520               |
|              | Pldh2   | ATAT <b><u>CCATGG</u></b> TAAGTCATCCTCTCGTAGTG | <i>Nco</i> I      |                   |
| <i>STldh</i> | ldhS1   | GCGC <b><u>AGATCT</u></b> GAAGAACACAATCCGACT   | <i>Bgl</i> III    | 166               |
|              | ldhS2   | TCCT <b><u>CCATGG</u></b> TCTAACACACCTTTCA     | <i>Nco</i> I      |                   |
| <i>fluc</i>  | FlucFor | ATAT <b><u>CCATGG</u></b> AGGACGCTAAGAACATCA   | <i>Nco</i> I      | 1669              |
|              | FlucRev | GCGC <b><u>TCTAGAC</u></b> CACAATTTGACTTGCCAC  | <i>Xba</i> I      |                   |

<sup>†</sup>: Bold and underlined sequences indicate restriction sites. Full target names are listed in main text.
