# Supplementary material for: In vivo bioluminescence imaging of the spatial and temporal colonization of lactobacillus plantarum 423 and enterococcus mundtii ST4SA in the intestinal tract of mice
Source: PubMed Central journal article supplement (PMC6208077; doi:10.1186/s12866-018-1315-4), 2018-10-30
Supplement: 12866_2018_1315_MOESM3_ESM.pdf [file 12866_2018_1315_MOESM3_ESM.pdf]

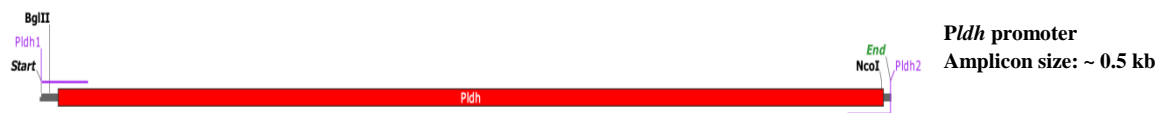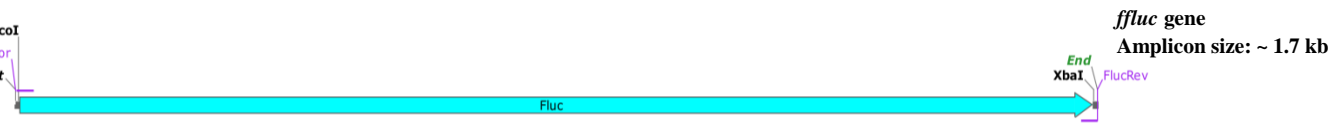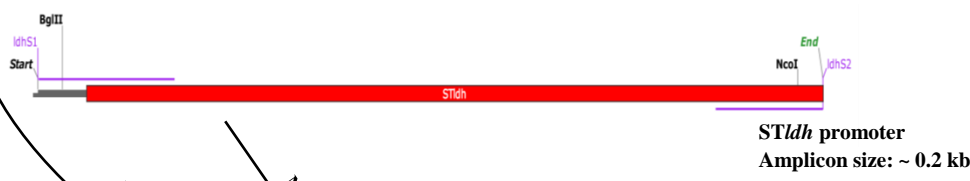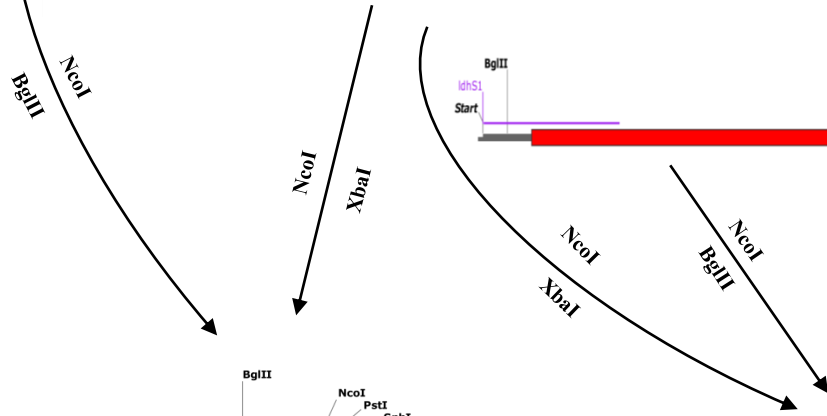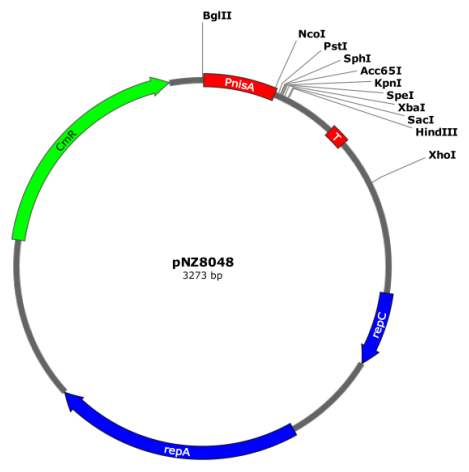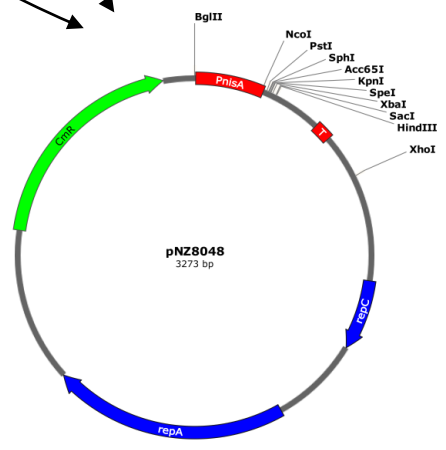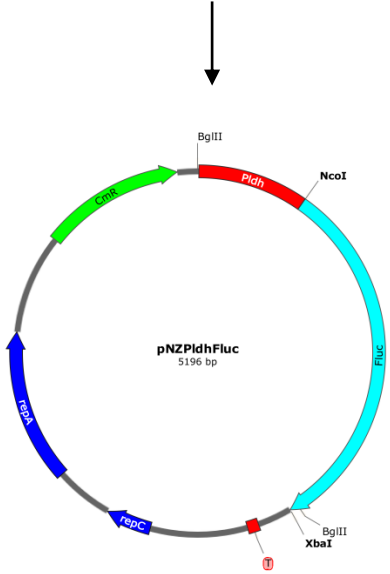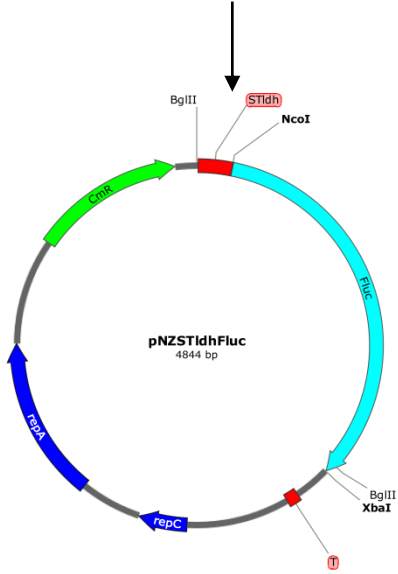

**Figure S2.** Schematic representing the construction of the pNZPldhFfluc and pNZSTldhFfluc luciferase expression plasmids. Relevant features are indicated, including restriction sites and PCR primers used for cloning; the *E. coli*/LAB *repA* and *repC* replication genes; the chloramphenicol acetyltransferase (*cat*) gene conferring resistance to chloramphenicol; the *Pldh* promoter from the *L. plantarum* 423 lactate dehydrogenase gene and the *STldh* promoter from the *E. mundtii* ST4SA lactate dehydrogenase gene.
